# Supplementary material for: Epithelial NAIPs protect against colonic tumorigenesis
Source: PubMed Central journal article supplement — J Exp Med. 2015 Mar 9;212(3):369–83. doi: 10.1084/jem.20140474 (PMC4354369; doi:10.1084/jem.20140474), 2015-03-09
Supplement: supp_jem.20140474_JEM_20140474_sm.pdf [file supp_jem.20140474_JEM_20140474_sm.pdf]

## SUPPLEMENTAL MATERIAL

Allam et al., <http://www.jem.org/cgi/content/full/jem.20140474/DC1>**Table S1.** qPCR primer sequences

| Gene name          | Primer sequence (fwd)             | Primer sequence (rev)          |
|--------------------|-----------------------------------|--------------------------------|
| <i>Naip1-6</i>     | 5'-AACTCAGAGAGATTGAGTTTTCTGGAC-3' | 5'-CCTGAGAGAACCCAGAGCCTG-3'    |
| <i>Naip1</i>       | 5'-CAGCCACCTAAAATAAGCTCTGG-3'     | 5'-GGACCCATGTTGGTCACTCC-3'     |
| <i>Naip2</i>       | 5'-AGCTTGGTGTCTGTTCTCTGT-3'       | 5'-TGGAGGGAAGATAGGTCCAC-3'     |
| <i>Naip5&amp;6</i> | 5'-GAGCCCTACCAGACATCAGTGAA-3'     | 5'-CTTCCAGCTTGGGGATCTTG-3'     |
| <i>IL-1a</i>       | 5'-ATGTATGCCTACTCGTCGGG-3'        | 5'-TGAGTTTTGGTGTCTCTGGC-3'     |
| <i>IL-1b</i>       | 5'-GAAAGTTGACGGACCCAAAA-3'        | 5'-GCCTGCCTGAAGCTCTTGT-3'      |
| <i>IL-6</i>        | 5'-GTAGCTATGGTACTCCAGAAGAC-3'     | 5'-ACGATGATGCACCTGCAGAA-3'     |
| <i>IL-11</i>       | 5'-TGTTCTCCTAACCCGATCCCT-3'       | 5'-CAGGAAGCTGCAAAGATCCCA-3'    |
| <i>IL-17</i>       | 5'-AGTTTCCCAGATCACAGA-3'          | 5'-TCCAGAAGGCCCTCAGACTA-3'     |
| <i>IL-18</i>       | 5'-TCCTTGAAGTTGACGCAA-3'          | 5'-TCCAGCATCAGGACAAAGAA-3'     |
| <i>IL-22</i>       | 5'-ACCTTTCCTGACCAAACCTCA-3'       | 5'-AGCTTCTTCTCGCTCAGACG-3'     |
| <i>Cxcl1</i>       | 5'-TCTCCGTTACTTGGGGACAC-3'        | 5'-ACCCAAACCGAAGTCATAGC-3'     |
| <i>Myc</i>         | 5'-TGAAGGCTGGATTTCCTTG-3'         | 5'-TTCTTCTCCTCGTCGAGAT-3'      |
| <i>Ccnd1</i>       | 5'-ACCTGCATGTTCTGGCCTCTAAG-3'     | 5'-CTCATCCGCCTCTGGCATTITG-3'   |
| <i>Ras</i>         | 5'-ATTGTCTCCCGCTTCTCAA-3'         | 5'-CAGGTCGAACACCAGGATGA-3'     |
| <i>Mmp9</i>        | 5'-AATAAAGACGACATAGACGGCA-3'      | 5'-AAGAGCCCGCAGTAGGG-3'        |
| <i>Timp1</i>       | 5'-GCAACTCGGACCTGGTCATAA-3'       | 5'-CGGCCCGTGAGTAGAAACT-3'      |
| <i>Stat3</i>       | 5'-GTTCTCGTCCACCACAA-3'           | 5'-TGATCTGACACCCTGAGTAG-3'     |
| <i>Bid</i>         | 5'-CAAACCTTGCCTTAGCCC-3'          | 5'-ACCGTTGCTGACCTCAGAGT-3'     |
| <i>Bcl-xL</i>      | 5'-TGACCACCTAGAGCCTTGA-3'         | 5'-AGAACCACACCAGCCACAGT-3'     |
| <i>Bcl-2</i>       | 5'-CATGTGTGTGGAGAGCGTCA-3'        | 5'-GCATGCTGGGGCCATATAGT-3'     |
| <i>Mdm2</i>        | 5'-AGCAGCGAGTCCACAGAGA-3'         | 5'-ATCCTGATCCAGGCAATCAC-3'     |
| <i>18S rRNA</i>    | 5'-GATCCATTGGAGGGCAAGTCT-3'       | 5'-CCAAGATCCAACCTACGAGCTTTT-3' |
